# Supplementary material for: Mesoporous acidic polymeric ionic liquids as novel solid acids for catalytic hydrolysis of ketoxime reactions
Source: Royal Society of Chemistry journal article supplement (doi:10.1039/d2ra06422g), 2022-01-01
Supplement: d2ra06422g1.pdf [file d2ra06422g1.pdf]

# **Mesoporous acidic polymeric ionic liquids as novel solid acids for catalytic hydrolysis of ketoxime reactions**

**Shanshan Zhao <sup>a</sup>, Zhengxiang Ma <sup>a</sup>, Peng Cheng <sup>a</sup>, Yanji Wang <sup>a,b</sup>, Xinqiang Zhao <sup>a</sup>, Qiusheng Yang <sup>a,b</sup>, Junqi Zhang, Dongsheng Zhang <sup>a,b\*</sup>**

*<sup>a</sup> Hebei Provincial Key Lab of Green Chemical Technology and High Efficient Energy Saving, Hebei University of Technology, Tianjin 300130, China;*

*<sup>b</sup> Hebei Industrial Technology Research Institute of Green Chemical Industry, Huanghua 061100, Hebei, China*

*E-mail: [zds1301@hebut.edu.cn](mailto:zds1301@hebut.edu.cn) (Dongsheng Zhang)*

**Table S1** Synthesis of various ionic liquids functionalized on polymers and catalytic performance test <sup>a</sup>.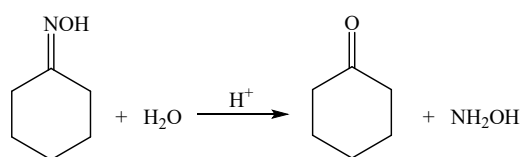

| Sample                                                                     | Cross-linking agent | ILs monomer | Anion exchange                  | Con. (%) <sup>b</sup> | Sel. (%) <sup>c</sup> |
|----------------------------------------------------------------------------|---------------------|-------------|---------------------------------|-----------------------|-----------------------|
| Poly(VPS-DVB)HSO <sub>4</sub>                                              | DVB                 | VPS         | H <sub>2</sub> SO <sub>4</sub>  | 73.29                 | 99.45                 |
| Poly(VBS-DVB)HSO <sub>4</sub>                                              | DVB                 | VBS         | H <sub>2</sub> SO <sub>4</sub>  | 76.75                 | 99.76                 |
| Poly(BuS-DVB)HSO <sub>4</sub>                                              | DVB                 | BuS         | H <sub>2</sub> SO <sub>4</sub>  | 69.38                 | 98.47                 |
| Poly(VPS-MBA)HSO <sub>4</sub>                                              | MBA                 | VPS         | H <sub>2</sub> SO <sub>4</sub>  | 65.39                 | 98.35                 |
| Poly(VBS-MBA)HSO <sub>4</sub>                                              | MBA                 | VBS         | H <sub>2</sub> SO <sub>4</sub>  | 69.87                 | 98.52                 |
| Poly(BuS-MBA)HSO <sub>4</sub>                                              | MBA                 | BuS         | H <sub>2</sub> SO <sub>4</sub>  | 68.13                 | 98.04                 |
| Poly(VBS-DVB)Cl                                                            | DVB                 | VBS         | HCl                             | 40.29                 | 98.13                 |
| Poly(VBS-DVB)NO <sub>3</sub>                                               | DVB                 | VBS         | HNO <sub>3</sub>                | 34.54                 | 98.48                 |
| Poly(VBS-DVB)H <sub>2</sub> PO <sub>4</sub>                                | DVB                 | VBS         | H <sub>3</sub> PO <sub>4</sub>  | 49.26                 | 98.65                 |
| Poly(VBS-DVB)COOCF <sub>3</sub>                                            | DVB                 | VBS         | COOCF <sub>3</sub>              | 19.89                 | 98.34                 |
| Poly(VBS-DVB)SO <sub>3</sub> CF <sub>3</sub>                               | DVB                 | VBS         | SO <sub>3</sub> CF <sub>3</sub> | 69.37                 | 98.41                 |
| H <sub>2</sub> SO <sub>4</sub> <sup>d</sup>                                | -                   | -           | -                               | 98.62                 | 98.82                 |
| HCl <sup>e</sup>                                                           | -                   | -           | -                               | 99                    | 98.58                 |
| HNO <sub>3</sub> <sup>f</sup>                                              | -                   | -           | -                               | 62.6                  | 96.9                  |
| [SPIPTES]CF <sub>3</sub> SO <sub>3</sub> @SiO <sub>2</sub> -5 <sup>g</sup> | -                   | -           | -                               | 38.41                 | 98.02                 |

<sup>a</sup> Reaction conditions: 0.5g cyclohexanone-oxime, 2g Catalysts, 55mL H<sub>2</sub>O, 60°C, 1h.<sup>b</sup> Conversion of cyclohexanone oxime.<sup>c</sup> Selectivity of hydroxylamine.<sup>d</sup> Reaction conditions: 0.05mol cyclohexanone-oxime, 0.1mol H<sub>2</sub>SO<sub>4</sub>, 55mL H<sub>2</sub>O, 60°C, 1h.<sup>e</sup> Reaction conditions: 15.0mmol cyclohexanone-oxime, 34.5mmol HCl, 833mmol H<sub>2</sub>O, 60°C, 1h, ref.<sup>8</sup><sup>f</sup> Reaction conditions: 0.02mol cyclohexanone-oxime, 0.06mol HNO<sub>3</sub>, 100mL H<sub>2</sub>O, 35°C, 2h, ref.<sup>49</sup><sup>g</sup> Reaction conditions: 0.5g cyclohexanone-oxime, 2g ILs/SiO<sub>2</sub> catalyst, 30 mL H<sub>2</sub>O, 60°C, 1h, ref.<sup>26</sup>

**Table S2** Coded Levels of Independent Factors in Box-Behnken Design <sup>a</sup>.

| Factors                   | Symbols        | Coned levels |    |     |
|---------------------------|----------------|--------------|----|-----|
|                           |                | −1           | 0  | +1  |
| Reaction temperature (°C) | X <sub>1</sub> | 40           | 60 | 80  |
| Catalyst amount (g)       | X <sub>2</sub> | 0.5          | 2  | 3.5 |
| Water consumption (mL)    | X <sub>3</sub> | 30           | 55 | 80  |

<sup>a</sup> Reaction time: 1 h, Cyclohexanone-oxime amount: 0.5 g.

**Table S3** Textural parameters of samples.

| Sample                        | BET surface area /m <sup>2</sup> ·g <sup>−1</sup> | Pore volume                       | Pore size |
|-------------------------------|---------------------------------------------------|-----------------------------------|-----------|
|                               |                                                   | /cm <sup>3</sup> ·g <sup>−1</sup> | /nm       |
| Poly(VBS-DVB)                 | 18.00                                             | 0.027                             | 10.97     |
| Poly(VBS-DVB)HSO <sub>4</sub> | 42.25                                             | 0.065                             | 10.92     |

**Table S4** Experimental Design and Experimental and Predicted Response Values.

| Run | Experimental variables |                |                | Cyo-o conversion Y(%) |           |
|-----|------------------------|----------------|----------------|-----------------------|-----------|
|     | X <sub>1</sub>         | X <sub>2</sub> | X <sub>3</sub> | Experimental          | Predicted |
| 1   | 0                      | 0              | 0              | 74.18                 | 73.66     |
| 2   | 0                      | 0              | 0              | 76.75                 | 73.66     |
| 3   | −1                     | −1             | 0              | 42.69                 | 44.19     |
| 4   | −1                     | +1             | 0              | 59.76                 | 59.22     |
| 5   | 0                      | 0              | 0              | 71.27                 | 73.66     |
| 6   | +1                     | 0              | −1             | 56.01                 | 55.13     |
| 7   | 0                      | +1             | +1             | 69.72                 | 69.38     |
| 8   | +1                     | +1             | 0              | 70.21                 | 68.71     |
| 9   | +1                     | −1             | 0              | 43.51                 | 44.05     |
| 10  | 0                      | −1             | +1             | 51.85                 | 49.47     |
| 11  | 0                      | +1             | −1             | 55.91                 | 58.29     |
| 12  | −1                     | 0              | +1             | 60.6                  | 61.48     |
| 13  | 0                      | −1             | −1             | 38.16                 | 38.51     |
| 14  | −1                     | 0              | −1             | 50.34                 | 48.49     |
| 15  | 0                      | 0              | 0              | 72.14                 | 73.66     |
| 16  | 0                      | 0              | 0              | 73.45                 | 73.66     |
| 17  | +1                     | 0              | +1             | 62.34                 | 64.19     |

**Table S5** ANOVA for the Fitted Polynomial Ceuadratic Model.

| source      | sum of squares | Df         | Mean square | <i>F</i> -value | <i>p</i> -value prob > <i>F</i> |
|-------------|----------------|------------|-------------|-----------------|---------------------------------|
| model       | 2348.02        | 9          | 260.89      | 41.79           | <0.0001                         |
| $X_1$       | 43.62          | 1          | 43.62       | 6.99            | 0.0333                          |
| $X_2$       | 787.85         | 1          | 787.85      | 126.2           | <0.0001                         |
| $X_3$       | 242.99         | 1          | 242.99      | 38.92           | 0.0004                          |
| $X_1X_2$    | 23.18          | 1          | 23.18       | 3.71            | 0.0953                          |
| $X_1X_3$    | 3.86           | 1          | 3.86        | 0.62            | 0.4574                          |
| $X_2X_3$    | 0.0036         | 1          | 0.0036      | 0.000567        | 0.9815                          |
| $X_1^2$     | 276.35         | 1          | 276.35      | 44.27           | 0.0003                          |
| $X_2^2$     | 558.20         | 1          | 558.20      | 89.42           | <0.0001                         |
| $X_3^2$     | 285.47         | 1          | 285.47      | 45.73           | 0.0003                          |
| residual    | 43.7           | 7          | 6.24        |                 |                                 |
| lack of fit | 25.04          | 3          | 8.35        | 1.79            | 0.2883                          |
| pure error  | 18.66          | 4          | 4.66        |                 |                                 |
| std dev     | $R^2$          | pred $R^2$ | adj $R^2$   | mean            | adeq precision                  |
| 2.5         | 0.9817         | 0.8203     | 0.9582      | 60.55           | 18.344                          |

**Table S6** Hydrolytic properties of Poly(VBS-DVB)HSO<sub>4</sub> for different ketoxime.<sup>a</sup>

| Entry | Substrate                                                                           | Con. (%) <sup>b</sup> | Sel. (%) <sup>c</sup> |
|-------|-------------------------------------------------------------------------------------|-----------------------|-----------------------|
| 1     | 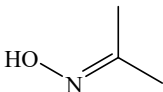 | 80.44                 | 98.79                 |
| 2     |  | 82.54                 | 98.24                 |
| 3     |  | 83.79                 | 99.02                 |
| 4     |  | 95.31                 | 95.23                 |

<sup>a</sup> Reaction conditions: 0.5g ketoxime, 2g Catalysts, 55mL H<sub>2</sub>O, 60°C, 1h.<sup>b</sup> Conversion of ketoxime.

° Selectivity of hydroxylamine.

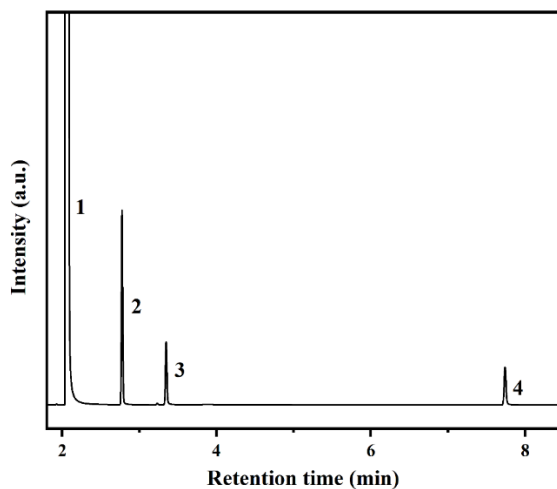

**Fig S1** Gas chromatography of reaction product for the hydrolysis of cyclohexanone oxime: 1. Dichloroethane; 2. Chlorobenzene; 3. Cyclohexanone; 4. Cyclohexanone oxime.

## 1. Model verification and optimization

Before analyzing the 3D surfaces and contours of the regression model, the following distribution map parameter tests are usually required to determine whether the response model fitted to the system is referable and how well it fits.

### 1.1. Residual distribution

It could be seen from the internal normalized normal probability diagram (Fig. S2) that the residual value distribution was concentrated on the straight line of 45°, indicating that the residual distribution was in good condition and the model prediction was reasonable.

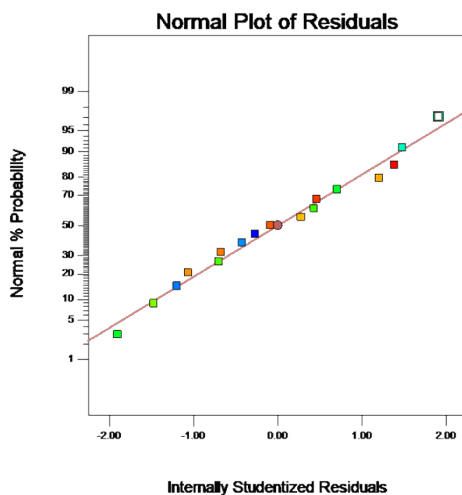

**Fig. S2** Normal probability plot of residuals for cyclohexanone-oxime conversion.

### 1.2. Residuals and predictions

From Fig. S3, it could be seen that the distribution between the residual point and the predicted value was irregular, and there was no obvious connection, indicating that the fitting state of the model fitted well.

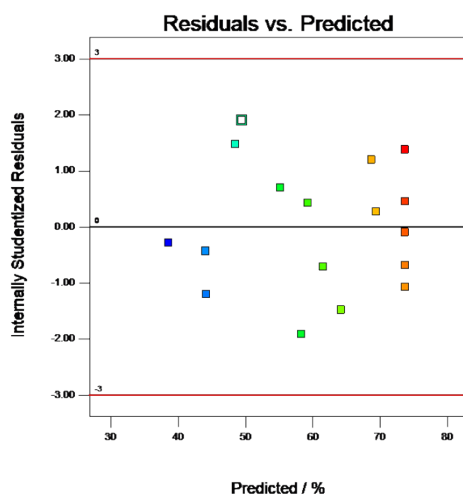

**Fig. S3** Plot between residual and predicted response for cyclohexanone-oxime conversion.

### 1.3. Residuals and trials

It could be seen from Fig. S4 that the fluctuation range of residual difference points in the figure was between  $-2$  and  $2$  with a reasonable width, and there is no obvious rule, which indicated that there was no obvious irrationality in the test data. The final output result would not deviate from individual samples.

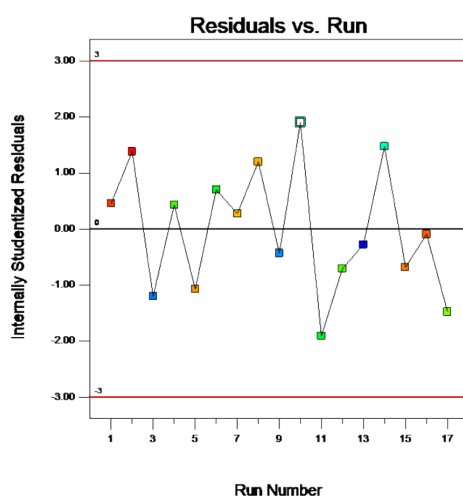

**Fig. S4** Plot between Residuals and experimental response for cyclohexanone-oxime conversion.

### 1.4. Predicted and actual values

From Fig. S5 and S6, it can be seen that the distribution points of the predicted and actual values were close to the center of the 45° straight line, indicating that the predicted values of the system are close to the data of the experimental measurements with small deviation and good fitting model effect.

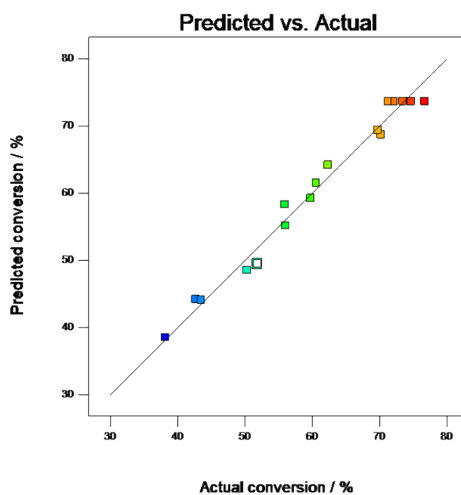

**Fig. S5** Experimental values were plotted against the predicted values derived from the model.

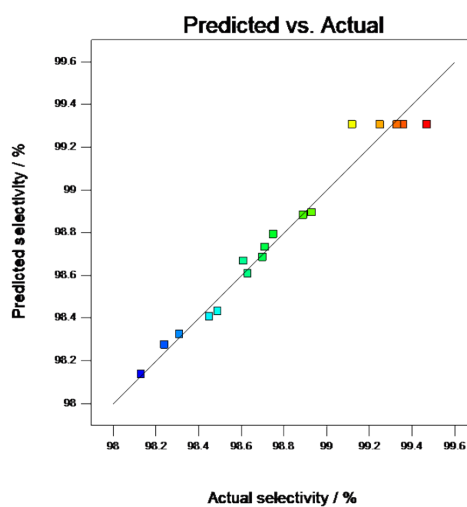

**Fig. S6** Experimental values were plotted against the predicted values derived from the model.
